# Supplementary material for: The Seagrass Methylome Is Associated With Variation in Photosynthetic Performance Among Clonal Shoots
Source: Front Plant Sci. 2020 Sep 4;11:571646. doi: 10.3389/fpls.2020.571646 (PMC7498905; doi:10.3389/fpls.2020.571646)
Supplement: Supplementary file 5 [file Table_1.xlsx]

## Sheet: SeagrassSamples(1)
Meters in the Transect	Sample ID of field transect samples	Sample ID in heat stress experiment
0
3	43
6
9	48
12
15	15
18
21	17
24	18
27
30	23
33
36	28	13.2
39
42	53	15.2
45
48	46	17.1
51
54	34
57
60	41
63	32
66
69	26
72
75	36
78		27.2
81	25
84
87	30
90	27
93
96
99
102
105	35
108	31
111
114	29
117
120	39
123
126	40
129
132	37
135
138	51
141
144	54
147
150	52
153
156	50
159
162	49
165
168	47	57.1
171
174	56	59.2
177
180	24
183
186	38	63.1
189
192	42
195
198	22
ca. 205	20
ca. 212	33
ca. 215
ca. 218	55
ca. 221	44
ca. 224
ca. 227	19
ca. 230
ca. 233	16
ca. 236	45	77.1, and 77.2
ca. 239
ca. 242	21	79.1
ca. 245
