# Supplementary material for: The Seagrass Methylome Is Associated With Variation in Photosynthetic Performance Among Clonal Shoots
Source: Front Plant Sci. 2020 Sep 4;11:571646. doi: 10.3389/fpls.2020.571646 (PMC7498905; doi:10.3389/fpls.2020.571646)
Supplement: Supplementary file 15 [file Table_11.xlsx]

## Sheet: DifferentialMethylationOverview
Comparison	Context	N sites changed in methylation state	Summarized n sites that changed in methylation state	N sites methylated in at least one of the experimental samples	Summarized n sites methylated in at least one of the methylated samples
ControlStress.up	genic.withoutTE.CG	17	257	13034	140099
ControlStress.up	genic.withoutTE.CHG	4		6162
ControlStress.up	genic.TE.CG	8		8972
ControlStress.up	genic.TE.CHG	2		4281
ControlStress.up	intergenic.withoutTE.CG	68		35514
ControlStress.up	intergenic.withoutTE.CHG	48		27249
ControlStress.up	intergenic.TE.CG	69		25363
ControlStress.up	intergenic.TE.CHG	41		19524
ControlStress.down	genic.withoutTE.CG	15	180	13034	140099
ControlStress.down	genic.withoutTE.CHG	12		6162
ControlStress.down	genic.TE.CG	21		8972
ControlStress.down	genic.TE.CHG	4		4281
ControlStress.down	intergenic.withoutTE.CG	37		35514
ControlStress.down	intergenic.withoutTE.CHG	33		27249
ControlStress.down	intergenic.TE.CG	31		25363
ControlStress.down	intergenic.TE.CHG	27		19524
ControlRecovery.up	genic.withoutTE.CG	72	1141	13034	140099
ControlRecovery.up	genic.withoutTE.CHG	23		6162
ControlRecovery.up	genic.TE.CG	82		8972
ControlRecovery.up	genic.TE.CHG	16		4281
ControlRecovery.up	intergenic.withoutTE.CG	225		35514
ControlRecovery.up	intergenic.withoutTE.CHG	270		27249
ControlRecovery.up	intergenic.TE.CG	201		25363
ControlRecovery.up	intergenic.TE.CHG	252		19524
ControlRecovery.down	genic.withoutTE.CG	41	647	13034	140099
ControlRecovery.down	genic.withoutTE.CHG	16		6162
ControlRecovery.down	genic.TE.CG	51		8972
ControlRecovery.down	genic.TE.CHG	8		4281
ControlRecovery.down	intergenic.withoutTE.CG	188		35514
ControlRecovery.down	intergenic.withoutTE.CHG	112		27249
ControlRecovery.down	intergenic.TE.CG	148		25363
ControlRecovery.down	intergenic.TE.CHG	83		19524
StressRecovery.up	genic.withoutTE.CG	1	18	13034	140099
StressRecovery.up	genic.withoutTE.CHG	0		6162
StressRecovery.up	genic.TE.CG	2		8972
StressRecovery.up	genic.TE.CHG	0		4281
StressRecovery.up	intergenic.withoutTE.CG	3		35514
StressRecovery.up	intergenic.withoutTE.CHG	8		27249
StressRecovery.up	intergenic.TE.CG	1		25363
StressRecovery.up	intergenic.TE.CHG	3		19524
StressRecovery.down	genic.withoutTE.CG	1	21	13034	140099
StressRecovery.down	genic.withoutTE.CHG	0		6162
StressRecovery.down	genic.TE.CG	0		8972
StressRecovery.down	genic.TE.CHG	0		4281
StressRecovery.down	intergenic.withoutTE.CG	8		35514
StressRecovery.down	intergenic.withoutTE.CHG	5		27249
StressRecovery.down	intergenic.TE.CG	2		25363
StressRecovery.down	intergenic.TE.CHG	5		19524
